# Supplementary material for: Excessive scleral shrinkage, rather than choroidal thickening, is a major contributor to the development of hypotony maculopathy after trabeculectomy
Source: PLOS journal article supplement (doi:10.1371/journal.pone.0191862), 2018-01-26

## CERTIFICATE OF EDITING

This is to certify that the paper titled Excessive scleral shrinkage, rather than choroidal thickening, is a major contributor to the development of hypotony maculopathy after trabeculectomy commissioned to us by Makoto Nakamura (神戸大学) has been edited for English language, grammar, punctuation, and spelling by Enago, the editing brand of Crimson Interactive Pvt. Ltd under Advance Editing.

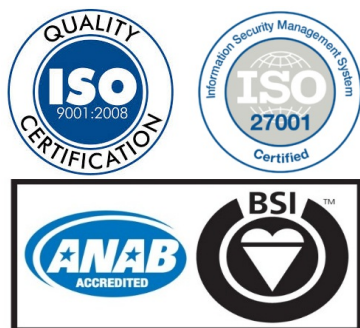

Issued by:  
Enago, Crimson Interactive Pvt. Ltd.  
1001, Techniplex - II, S. V. Road,  
Goregaon (W), Mumbai 400062, India.  
Phone: 03-5050-5374  
Fax: 03-4496-4934

Disclaimer: The author is free to accept or reject our changes in the document after our editing. However, we do not bear responsibility for revisions made to the document after our edit on 16 Jun 2017.

**Global** www.enago.com, www.ulatus.com, www.voxtab.com  
**Japan** www.enago.jp, www.ulatus.jp, www.voxtab.jp  
**Taiwan** www.enago.tw  
**China** www.enago.cn  
**Brazil** www.enago.com.br

**Germany** www.enago.de  
**Russia** www.enago.ru  
**Arabic** www.enago.ae  
**Turkey** www.enago.com.tr  
**S. Korea** www.enago.co.kr

**About Crimson:**  
Crimson Interactive Inc. provides  
English language editing, transcription,  
and translation services to individuals  
and corporate customers worldwide.

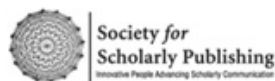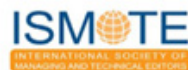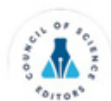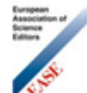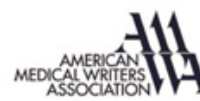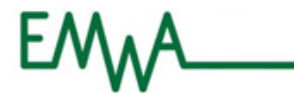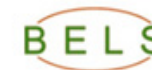

Supplement: S2 (10.1371/journal.pone.0191862.s002) [file journal.pone.0191862.s002]
